# Supplementary material for: Enhanced Removal of Cr(VI) Using Nitrogen-Doped Soy Sauce Residue Biochar: A Comprehensive Study on Preparation, Mechanisms, and Applications
Source: Research Square preprint supplement (doi:10.21203/rs.3.rs-5739941/v1), 2025-04-10
Supplement: Supplementary file 1 [file 7d1c73a587fc2edab9f32cc2.docx]

**Enhanced Removal of Cr(VI) Using Nitrogen-Doped Soy Sauce Residue Biochar: A Comprehensive Study on Preparation, Mechanisms, and Applications**

**, as follows:**

1.In this study, bio-carbon was made from soy sauce residue innovatively, which not only reduced the cost of waste treatment, but also transformed into high-value environmental protection material.

2.By nitrogen doping, the functional groups (such as amino and pyridyl nitrogen) on the surface of biochar were enhanced significantly, so that the adsorption capacity and selectivity of Cr(VI) were improved, and the chemical characteristics were optimized.

3.The large specific surface area and porous structure of soy sauce residue biochar enhanced its adsorption capacity of hexavalent chromium and effectively removed the pollutants in water.

4.Nitrogen doping also improved the electrochemical properties of biochar, promoted the reduction of hexavalent chromium to trivalent chromium with lower toxicity, and further reduced the environmental risk.

5.The preparation cost of nitrogen-doped soy sauce residue biochar is lower, and the raw material source is extensive, which shows good economic and feasibility.
