# Supplementary material for: Enhanced Removal of Cr(VI) Using Nitrogen-Doped Soy Sauce Residue Biochar: A Comprehensive Study on Preparation, Mechanisms, and Applications
Source: Research Square preprint supplement (doi:10.21203/rs.3.rs-5739941/v1), 2025-04-10
Supplement: Supplementary file 2 [file e255bcd9f2e162faa123968a.docx]

To get insight into rate-controlling mechanism of Cr(VI) adsorption on to N-SRB, the experimental data were further analyzed through pseudo-first-order kinetic model, pseudo second-order kinetic model, intra-particle diffusion Weber–Morris model, and Elovich model.

Pseudo-first-order kinetic model:

(3)

Pseudo-second-order kinetic model:

(4)

Weber-Morris model:

(5)

Elovich model:

(6)

where and are the adsorption capacities at equilibrium and time , respectively. , , and are the pseudo-first order, pseudo-second-order rate constants and intra-particle diffusion constant. is the intercept that represents the thickness of the boundary layer.

Whereas α is the initial removal rate; β is a constant associated with surface coverage and activation energy for Elovich equation and Re is Elovich equilibrium parameter, where Elovich equilibrium parameter is given as Re= β/qe.
